# Supplementary material
Source: PubMed Central journal article supplement (PMC4375871)
Supplement: rspb20142953supp3.pdf [file rspb20142953supp3.pdf]

| Species                                            | Reads            | Reads post-trimming | Contigs  | Total length      | N50                      | Peptides | Iso-filtered ORFs | Locality/Region of Origin                                                                 | Collector                                                  | SRA BioProject | SRA Run    | MCZ IZ Voucher No. |
|----------------------------------------------------|------------------|---------------------|----------|-------------------|--------------------------|----------|-------------------|-------------------------------------------------------------------------------------------|------------------------------------------------------------|----------------|------------|--------------------|
| <b>SCORPIONOIDEA</b>                               |                  |                     |          |                   |                          |          |                   |                                                                                           |                                                            |                |            |                    |
| Scorpionidae: <i>Pandinus imperator</i>            | 17620229         | 16666951            | 139997   | 68457309          | 585                      | 21247    | 20279             | West Africa                                                                               |                                                            |                |            |                    |
| Locheilidae: <i>Locheilus australis</i>            | 15082229         | 14723844            | 173567   | 70859282          | 415                      | 22979    | 22581             | Taiwan: Kenting: Kenting Forest Recreational Area. 21°57'586" N 120°49'223" E. 26-vi-2013 | S.L. Boyer, G. Giribet, M.S. Harvey, M.G. Rix, P.P. Sharma | PRJNA270658    | SRR1721600 | 46979              |
| <i>Hadogenes troglodytes</i>                       | 19210515         | 18114733            | 194759   | 87603279          | 482                      | 22383    | 21561             | Mozambique                                                                                |                                                            | PRJNA270659    | SRR1721664 | 16114              |
| <i>Opisthacanthus madagascarensis</i>              | 21158446         | 18937117            | 384543   | 155421630         | 396                      | 24585    | 22856             | Madagascar: Toliara Province                                                              |                                                            | PRJNA270662    | SRR1721665 | 46942              |
| Bothriuridae: <i>Bothriurus burmeisteri</i>        | 27203966         | 26560862            | 119748   | 62649095          | 675                      | 21240    | 20574             | Chile                                                                                     |                                                            | PRJNA270664    | SRR1721668 | 46943              |
| Diplocentridae: <i>Diplocentrus diablo</i>         | 25583200         | 24811563            | 201918   | 87406785          | 456                      | 27168    | 26245             | Mexico                                                                                    |                                                            | PRJNA270667    | SRR1721670 | 46909              |
| Urodacidae: <i>Urodacus planimanus</i>             | 16642385         | 15937822            | 99395    | 67092385          | 1072                     | 31614    | 30676             | Australia                                                                                 | M.G. Rix, M.S. Harvey                                      | PRJNA270668    | SRR1721672 | 46936              |
|                                                    |                  |                     |          |                   |                          |          |                   |                                                                                           |                                                            | n/a            | n/a        | 46989              |
| <b>IIUROIDEA</b>                                   |                  |                     |          |                   |                          |          |                   |                                                                                           |                                                            |                |            |                    |
| Caraboctonidae: <i>Hadrurus arizonensis</i>        | 21465320         | 21007002            | 159818   | 70203461          | 467                      | 19660    | 19266             | US: Arizona                                                                               |                                                            | PRJNA270669    | SRR1721733 | 46930              |
| Iuridae: <i>Iurus dekamum</i>                      | 11774511         | 11176439            | 76669    | 36853746          | 560                      | 17954    | 17619             | Greece: Crete                                                                             |                                                            | PRJNA270671    | SRR1721734 | 46961              |
| <b>CHACTOIDEA</b>                                  |                  |                     |          |                   |                          |          |                   |                                                                                           |                                                            |                |            |                    |
| Chaetidae: <i>Anuroctonus phaidactylus</i>         | 21530977         | 21006190            | 158446   | 72205445          | 511                      | 24169    | 23533             | US: California                                                                            |                                                            | PRJNA270683    | SRR1721879 | 46934              |
| <i>Brotheus granulatus</i>                         | 20318273         | 17637786            | 134137   | 62637010          | 521                      | 20166    | 19513             | Brazil: Manaus, Amazonas                                                                  | G. Giribet                                                 | PRJNA270684    | SRR1721887 | 46934              |
| Euscorpidae: <i>Euscorpis italicus</i>             | 12667128         | 11905482            | 108927   | 52421090          | 569                      | 20576    | 20096             | Switzerland: Chateaufeu, Valais, ix-2013.                                                 | L. Monod                                                   | PRJNA270686    | SRR1721892 | 46939              |
| <i>Magacornus</i> sp.                              | 37103196         | 33860561            | 62656    | 35588285          | 770                      | 17008    | 16454             | Mexico: Veracruz: Calchahuac, Atotonilco. 19°8'383" N 97°12'067" E. 4-14-x-2013           | E. González Santillán, F. Álvarez Padilla                  | PRJNA270687    | SRR1767669 | 46940              |
| Scorpioidea: <i>Scorpio</i> sp.                    | 19929085         | 16977482            | 272742   | 118767427         | 445                      | 26720    | 24941             | Thailand: Phitsanulok Prov., Nakhon Thai Distr., Phu Hin Rongkla N.P., 1290m, 23-xii-2013 | P. Schwendinger                                            | PRJNA270692    | SRR1767662 | 46984              |
| Superstitionidae: <i>Superstitionia densis</i>     | 23245173         | 22405195            | 166551   | 71788644          | 459                      | 24619    | 23916             | US: Arizona                                                                               |                                                            | PRJNA270688    | SRR1721951 | 46987              |
| Troglotaxiscidae: <i>Bolivarius sambesi</i>        | 10567924         | 9970771             | 101260   | 47671035          | 542                      | 19773    | 19324             | France: Road le Tech-Col de Sous, Pyrénées Orientale, 707m, 14-ix-2013                    | L. Cauwet, T. Andriollo, L. Monod                          | PRJNA270693    | SRR1721953 | 46988              |
| Vaejovidae: <i>Paravaejovis spinigerus</i>         | 8892658          | 8379914             | 97571    | 47090425          | 564                      | 19624    | 19226             | US: Arizona                                                                               |                                                            | PRJNA270694    | SRR1721954 | 46990              |
| <i>Smeringurus mesasiensis</i>                     | 23066807         | 22153197            | 247631   | 104346593         | 442                      | 38261    | 37055             | US: Arizona                                                                               | L.A. Esposito                                              | PRJNA270696    | SRR1721955 | 46994              |
| <b>CHAERLOIDEA</b>                                 |                  |                     |          |                   |                          |          |                   |                                                                                           |                                                            |                |            |                    |
| Chaerilidae: <i>Chaerilus celebensis</i>           | 20801179         | 17705092            | 215165   | 93633393          | 447                      | 25972    | 24310             | Philippines: Luzon                                                                        |                                                            | PRJNA270679    | SRR1721804 | 46935              |
| <b>BUTHOIDEA</b>                                   |                  |                     |          |                   |                          |          |                   |                                                                                           |                                                            |                |            |                    |
| Buthidae: <i>Centruroides sculpturatus</i>         | 24260079         | 23606802            | 252086   | 151962606         | 879                      | 58467    | 16496             | US: Arizona                                                                               |                                                            | PRJNA255346    | SRR1515193 | 46910              |
| <i>Hotentotta trilineatus</i>                      | 9498355          | 8988274             | 118058   | 54754702          | 521                      | 20469    | 19741             | Sub-Saharan Africa                                                                        |                                                            | PRJNA270678    | SRR1721800 | 46918              |
| <i>Parabuthus transvaalicus</i>                    | 18836538         | 17802353            | 211157   | 89341714          | 433                      | 20925    | 20217             | Southern Africa                                                                           |                                                            | PRJNA270677    | SRR1721799 | 46920              |
| <i>Androctonus australis</i>                       | 15028017         | 14242695            | 158114   | 68505937          | 450                      | 19742    | 17851             | Northern Africa                                                                           |                                                            | PRJNA270676    | SRR1724216 | 46926              |
| <b>PSEUDOCHACTOIDEA</b>                            |                  |                     |          |                   |                          |          |                   |                                                                                           |                                                            |                |            |                    |
| Pseudochactidae: <i>Troglodermomachus steineri</i> | 20456204         | 19077325            | 122671   | 60983094          | 581                      | 20634    | 19547             | Laos: Khammouane: Xe Bangfai Cave, ca. 0.5 km inside cave, on alluvial sand. 19-iv-2014   | P.P. Sharma, V. Vorlachak                                  | PRJNA270673    | SRR1721739 | 46969              |
| <i>Vietboop lao</i>                                | 19987805         | 18525856            | 146981   | 71330622          | 543                      | 21193    | 20007             | Laos: Khammouane: Ban Naden Cave, ca. 0.2 km inside cave, on clay floor 18-iv-2014        | P.P. Sharma, V. Vorlachak                                  | PRJNA270675    | SRR1721740 | 46973              |
| <b>OUTGROUPS</b>                                   |                  |                     |          |                   |                          |          |                   |                                                                                           |                                                            |                |            |                    |
| Pseudoscorpiones: <i>Haplochernes</i> sp.          | 11976066         | 11111478            | 217966   | 89689290          | 426                      | 32300    | 16376             | Taiwan: Kenting: Kenting Forest Recreational Area. 21°57'586" N 120°49'223" E. 26-vi-2013 | S.L. Boyer, G. Giribet, M.S. Harvey, M.G. Rix, P.P. Sharma | PRJNA270672    | SRR1767661 | 46997              |
| <i>Synsphyranus optimelus</i>                      |                  |                     |          |                   |                          |          |                   |                                                                                           |                                                            |                |            |                    |
| Amblypygi: <i>Damon variegatus</i>                 |                  |                     |          |                   |                          |          |                   |                                                                                           |                                                            |                |            |                    |
| Uropygi: <i>Mastigoproctus giganteus</i>           |                  |                     |          |                   |                          |          |                   |                                                                                           |                                                            |                |            |                    |
| Araneae: <i>Liphistius malaysianus</i>             |                  |                     |          |                   |                          |          |                   |                                                                                           |                                                            |                |            |                    |
| <i>Leucauge venusta</i>                            |                  |                     |          |                   |                          |          |                   |                                                                                           |                                                            |                |            |                    |
| Opiliones: <i>Siro boyerac</i>                     |                  |                     |          |                   |                          |          |                   |                                                                                           |                                                            |                |            |                    |
| <i>Trogulus martensi</i>                           |                  |                     |          |                   |                          |          |                   |                                                                                           |                                                            |                |            |                    |
| <i>Pachyliscus acutus</i>                          |                  |                     |          |                   |                          |          |                   |                                                                                           |                                                            |                |            |                    |
| <i>Leiobunum verrucosum</i>                        |                  |                     |          |                   |                          |          |                   |                                                                                           |                                                            |                |            |                    |
| Solifugae: <i>Eremobates</i> sp.                   |                  |                     |          |                   |                          |          |                   |                                                                                           |                                                            |                |            |                    |
| Ricinulei: <i>Ricinoides atrata</i>                |                  |                     |          |                   |                          |          |                   |                                                                                           |                                                            |                |            |                    |
| Xiphosura: <i>Limulus polyphemus</i>               |                  |                     |          |                   |                          |          |                   |                                                                                           |                                                            |                |            |                    |
| <b>ADDITIONAL DATA SETS</b>                        |                  |                     |          |                   |                          |          |                   |                                                                                           |                                                            |                |            |                    |
|                                                    | Data set type    | ESTs/Genes          | Peptides | Iso-filtered ORFs | Source                   |          |                   |                                                                                           |                                                            |                |            |                    |
| Scorpionidae: <i>Heterometrus petersii</i>         | EST library      | 262                 | 153      | 135               | Ma et al. 2010           |          |                   |                                                                                           |                                                            |                |            |                    |
| Scorpionidae: <i>Scorpio maurus palmatus</i>       | EST library      | 102                 | 33       | 28                | Abdel-Rahman et al. 2013 |          |                   |                                                                                           |                                                            |                |            |                    |
| Scorpioidea: <i>Scorpio jendeki</i>                | EST library      | 871                 | 420      | 132               | Ma et al. 2009           |          |                   |                                                                                           |                                                            |                |            |                    |
| Scorpionidae: <i>Scorpiops margerisonae</i>        | EST library      | 360                 | 184      | 184               | Ma et al. 2012           |          |                   |                                                                                           |                                                            |                |            |                    |
| Buthidae: <i>Centruroides vittatus</i>             | Illumina library | 14215               | 3859     | 3050              | Sharma et al. 2014       |          |                   |                                                                                           |                                                            |                |            |                    |
| Buthidae: <i>Isometrus maculatus</i>               | EST library      | 328                 | 167      | 164               | Ma et al. 2012           |          |                   |                                                                                           |                                                            |                |            |                    |
| Buthidae: <i>Lychas mucronatus</i>                 | EST library      | 1068                | 374      | 339               | Zhao et al. 2010         |          |                   |                                                                                           |                                                            |                |            |                    |
| Buthidae: <i>Mesobuthus gibbosus</i>               | EST library      | 982                 | 379      | 330               | Diego-García et al. 2014 |          |                   |                                                                                           |                                                            |                |            |                    |
| Buthidae: <i>Mesobuthus martensi</i>               | Genome           | 32016               | 32016    | n/a               | Cao et al. 2013          |          |                   |                                                                                           |                                                            |                |            |                    |
| Buthidae: <i>Titus serrulatus</i>                  | EST library      | 1354                | 433      | 312               | Alvarenga et al. 2012    |          |                   |                                                                                           |                                                            |                |            |                    |
| Buthidae: <i>Titus stigmurus</i>                   | EST library      | 153                 | 56       | 55                | Almeida et al. 2012      |          |                   |                                                                                           |                                                            |                |            |                    |
