# Supplementary material
Source: PubMed Central journal article supplement (PMC4375871)
Supplement: rspb20142953supp4.pdf [file rspb20142953supp4.pdf]

## OMA -- 38 Taxon Matrix

|                                       | Matrix 1   | Matrix 2   | Matrix 3    | Matrix 4    | Matrix 5   | Matrix 6   | Matrix 7    | Matrix 8   | Matrix 9   | Matrix 10  | Matrix 11 | Matrix 12  | Matrix 13  | Matrix 14   |
|---------------------------------------|------------|------------|-------------|-------------|------------|------------|-------------|------------|------------|------------|-----------|------------|------------|-------------|
| <i>Pandinus imperator</i>             | 131        | 561        | 1385        | 3790        | 116        | 427        | 2136        | 452        | 451        | 450        | 65        | 262        | 604        | 1305        |
| <i>Liocheles australasiae</i>         | 114        | 452        | 1068        | 2709        | 82         | 337        | 1550        | 346        | 345        | 344        | 59        | 211        | 462        | 915         |
| <i>Hadogenes troglodytes</i>          | 132        | 560        | 1374        | 3707        | 115        | 429        | 2110        | 445        | 444        | 443        | 65        | 263        | 614        | 1287        |
| <i>Opisthacanthus madagascarensis</i> | 136        | 577        | 1441        | 3937        | 124        | 442        | 2219        | 473        | 472        | 471        | 67        | 269        | 639        | 1359        |
| <i>Bothriurus burmeisteri</i>         | 131        | 552        | 1426        | 4115        | 114        | 415        | 2216        | 444        | 443        | 442        | 65        | 257        | 624        | 1411        |
| <i>Diplocentrus diablo</i>            | 131        | 546        | 1381        | 3873        | 116        | 411        | 2158        | 439        | 438        | 437        | 64        | 253        | 608        | 1346        |
| <i>Urodacus planimanus</i>            | 136        | 588        | 1489        | 4163        | 128        | 443        | 2304        | 481        | 480        | 479        | 67        | 277        | 663        | 1461        |
| <i>Hadrurus arizonensis</i>           | 132        | 546        | 1293        | 3318        | 105        | 413        | 1866        | 426        | 425        | 424        | 65        | 258        | 566        | 1121        |
| <i>Iurus dekanum</i>                  | 132        | 539        | 1232        | 2934        | 107        | 411        | 1720        | 419        | 418        | 417        | 64        | 244        | 536        | 976         |
| <i>Anuroctonus phaiodactylus</i>      | 130        | 562        | 1389        | 3987        | 118        | 419        | 2170        | 453        | 452        | 451        | 64        | 262        | 609        | 1341        |
| <i>Brotheas granulatus</i>            | 135        | 571        | 1426        | 3877        | 119        | 431        | 2132        | 461        | 460        | 459        | 66        | 268        | 630        | 1340        |
| <i>Euscorpium italicus</i>            | 134        | 561        | 1386        | 3624        | 117        | 426        | 2018        | 454        | 453        | 452        | 66        | 262        | 608        | 1218        |
| <i>Megacormus</i> sp.                 | 135        | 587        | 1457        | 3901        | 116        | 443        | 2167        | 461        | 460        | 459        | 66        | 272        | 643        | 1333        |
| <i>Scorpiops</i> sp.                  | 134        | 588        | 1458        | 4086        | 125        | 445        | 2263        | 471        | 470        | 469        | 66        | 275        | 647        | 1403        |
| <i>Superstitionia donensis</i>        | 134        | 558        | 1343        | 3609        | 122        | 427        | 2047        | 457        | 456        | 455        | 65        | 259        | 591        | 1224        |
| <i>Belisarius xambeui</i>             | 136        | 570        | 1358        | 3466        | 117        | 430        | 1994        | 446        | 445        | 444        | 67        | 263        | 600        | 1168        |
| <i>Paravaejovis spinigerus</i>        | 128        | 504        | 1175        | 2875        | 107        | 392        | 1747        | 414        | 413        | 412        | 62        | 230        | 524        | 1002        |
| <i>Smeringurus mesaensis</i>          | 129        | 480        | 1088        | 2880        | 97         | 372        | 1617        | 380        | 379        | 378        | 65        | 230        | 476        | 952         |
| <i>Chaerilus celebensis</i>           | 134        | 574        | 1411        | 3917        | 122        | 437        | 2178        | 451        | 450        | 449        | 65        | 270        | 631        | 1357        |
| <i>Centruroides sculpturatus</i>      | 133        | 554        | 1342        | 3727        | 112        | 422        | 2114        | 446        | 445        | 444        | 65        | 257        | 593        | 1325        |
| <i>Hotentotta trilineatus</i>         | 131        | 551        | 1369        | 3855        | 113        | 415        | 2155        | 443        | 442        | 441        | 65        | 255        | 602        | 1335        |
| <i>Parabuthus transvaalicus</i>       | 132        | 556        | 1379        | 3740        | 109        | 426        | 2130        | 447        | 446        | 445        | 64        | 264        | 614        | 1328        |
| <i>Androctonus australis</i>          | 134        | 580        | 1404        | 3901        | 119        | 442        | 2213        | 458        | 457        | 456        | 65        | 272        | 621        | 1339        |
| <i>Troglokhammouanus steineri</i>     | 135        | 582        | 1473        | 4244        | 124        | 442        | 2318        | 476        | 475        | 474        | 66        | 272        | 658        | 1481        |
| <i>Vietbocap lao</i>                  | 133        | 586        | 1472        | 4260        | 122        | 444        | 2317        | 472        | 471        | 470        | 65        | 273        | 654        | 1469        |
| <i>Synsphyronus apimelus</i>          | 127        | 520        | 1205        | 2670        | 98         | 394        | 1687        | 389        | 388        | 387        | 62        | 251        | 562        | 1074        |
| <i>Haplochernes</i> sp.               | 112        | 394        | 865         | 1990        | 77         | 295        | 1214        | 291        | 290        | 289        | 54        | 187        | 391        | 780         |
| <i>Damon variegatus</i>               | 126        | 481        | 1065        | 2312        | 99         | 367        | 1449        | 344        | 343        | 342        | 60        | 223        | 469        | 870         |
| <i>Mastigoproctus giganteus</i>       | 132        | 550        | 1330        | 3212        | 118        | 413        | 1892        | 443        | 442        | 441        | 66        | 265        | 601        | 1237        |
| <i>Liphistius malayanus</i>           | 131        | 541        | 1256        | 2772        | 116        | 407        | 1674        | 412        | 411        | 410        | 64        | 255        | 560        | 1066        |
| <i>Leucauge venusta</i>               | 128        | 541        | 1300        | 3269        | 117        | 418        | 1894        | 427        | 426        | 425        | 63        | 257        | 605        | 1287        |
| <i>Siro boyerae</i>                   | 130        | 531        | 1305        | 3194        | 115        | 400        | 1889        | 433        | 432        | 431        | 63        | 248        | 584        | 1267        |
| <i>Trogulus martensi</i>              | 134        | 562        | 1382        | 3443        | 120        | 429        | 2028        | 458        | 457        | 456        | 66        | 269        | 629        | 1378        |
| <i>Pachylicus acutus</i>              | 128        | 530        | 1191        | 2582        | 108        | 402        | 1633        | 417        | 416        | 415        | 63        | 246        | 526        | 1016        |
| <i>Leiobunum verrucosum</i>           | 130        | 537        | 1301        | 3353        | 113        | 411        | 1973        | 428        | 427        | 426        | 64        | 258        | 589        | 1354        |
| <i>Ricinoides atewa</i>               | 125        | 514        | 1210        | 2864        | 99         | 385        | 1739        | 391        | 390        | 389        | 61        | 239        | 547        | 1121        |
| <i>Eremobates</i> sp.                 | 129        | 476        | 1051        | 2388        | 88         | 366        | 1429        | 359        | 358        | 357        | 62        | 223        | 471        | 933         |
| <i>Limulus polyphemus</i>             | 131        | 552        | 1303        | 3091        | 111        | 420        | 1850        | 413        | 412        | 411        | 67        | 260        | 577        | 1190        |
| <b>TOTAL</b>                          | <b>136</b> | <b>599</b> | <b>1557</b> | <b>5025</b> | <b>131</b> | <b>453</b> | <b>2580</b> | <b>500</b> | <b>500</b> | <b>577</b> | <b>67</b> | <b>280</b> | <b>689</b> | <b>1725</b> |

**Buthida only -- 17 Taxon Matrix**

|                                  |            |
|----------------------------------|------------|
| <i>Androctonus australis</i>     | 640        |
| <i>Centruroides sculpturatus</i> | 621        |
| <i>Centruroides vittatus</i>     | 520        |
| <i>Hotentotta trilineatus</i>    | 632        |
| <i>Isometrus maculatus</i>       | 52         |
| <i>Lychas mucronatus</i>         | 80         |
| <i>Mesobuthus martensii</i>      | 162        |
| <i>Mesobuthus gibbosus</i>       | 86         |
| <i>Parabuthus transvaalicus</i>  | 629        |
| <i>Tityus serrulatus</i>         | 70         |
| <i>Tityus stigmurus</i>          | 20         |
| <i>Chaerilus celebensis</i>      | 637        |
| <i>Iurus dekanum</i>             | 617        |
| <i>Troglokhamouanus steineri</i> | 640        |
| <i>Vietbocap lao</i>             | 638        |
| <b>TOTAL</b>                     | <b>649</b> |

**lurida only -- 16 Taxon Matrix**

|                                       |             |
|---------------------------------------|-------------|
| <i>Pandinus imperator</i>             | 1321        |
| <i>Liocheles australasiae</i>         | 1250        |
| <i>Hadogenes troglodytes</i>          | 1338        |
| <i>Opisthacanthus madagascarensis</i> | 1360        |
| <i>Bothriurus burmeisteri</i>         | 1309        |
| <i>Diplocentrus diablo</i>            | 1313        |
| <i>Heterometrus petersii</i>          | 23          |
| <i>Scorpio maurus palmatus</i>        | 7           |
| <i>Urodacus planimanus</i>            | 1370        |
| <i>Hadrurus arizonensis</i>           | 1289        |
| <i>Iurus dekanum</i>                  | 1271        |
| <i>Anuroctonus phaiodactylus</i>      | 1335        |
| <i>Brotheas granulatus</i>            | 1343        |
| <i>Euscorpium italicus</i>            | 1334        |
| <i>Megacormus sp.</i>                 | 1368        |
| <i>Scorpiops jendeki</i>              | 23          |
| <i>Scorpiops margerisonae</i>         | 35          |
| <i>Scorpiops sp.</i>                  | 1365        |
| <i>Superstitionia donensis</i>        | 1248        |
| <i>Belisarius xambeui</i>             | 1314        |
| <i>Paravaejovis spinigerus</i>        | 1196        |
| <i>Smeringurus mesaensis</i>          | 1166        |
| <b>TOTAL</b>                          | <b>1405</b> |
