# Supplementary material
Source: PubMed Central journal article supplement (PMC4375871)
Supplement: rspb20142953supp5.pdf [file rspb20142953supp5.pdf]

| Taxon                                | Ovariterus           | Trichobothrial pattern | Lateral lymphoid organs | Hemispermataphore truncal flexure |
|--------------------------------------|----------------------|------------------------|-------------------------|-----------------------------------|
| Buthidae                             | 8-celled or 2-celled | Type A                 | Absent                  | Absent                            |
| Pseudochactidae                      | 6-celled             | Type D                 | Absent                  | Absent                            |
| Chaeriliidae                         | 6-celled             | Type B                 | Absent                  | Absent                            |
| Iuridae                              | 6-celled             | Type C                 | Present                 | Present                           |
| Bothriuridae                         | 6-celled             | Type C                 | Present                 | Present                           |
| Superstitioniidae                    | 6-celled             | Type C                 | Present                 | Present                           |
| Vaejovidae (Smeringurinae)           | 6-celled             | Type C                 | Present                 | Present                           |
| Chactidae ( <i>Anuroctonus</i> )     | 6-celled             | Type C                 | Present                 | Present                           |
| Chactidae ( <i>Brotheini</i> )       | 6-celled             | Type C                 | Present                 | Present                           |
| Euscorpiidae                         | 6-celled             | Type C                 | Present                 | Present                           |
| Scorpiopidae                         | 6-celled             | Type C                 | Present                 | Present                           |
| Troglotayosicidae                    | 6-celled             | Type C                 | Present                 | Present                           |
| Caraboctonidae                       | 6-celled             | Type C                 | Present                 | Present                           |
| Vaejovidae (Syntropinae)             | 6-celled             | Type C                 | Present                 | Present                           |
| Urodacidae                           | 6-celled             | Type C                 | Present                 | Present                           |
| Hormuridae ( <i>Liocheles</i> )      | 6-celled             | Type C                 | Present                 | Present                           |
| Diplocentridae                       | 6-celled             | Type C                 | Present                 | Present                           |
| Hormuridae ( <i>Opisthacanthus</i> ) | 6-celled             | Type C                 | Present                 | Present                           |
| Hormuridae ( <i>Hadogenes</i> )      | 6-celled             | Type C                 | Present                 | Present                           |
| Scorpionidae                         | 6-celled             | Type C                 | Present                 | Present                           |

| Taxon                                | Sternum                                              | Venom glands | Pedal spurs                                           | Internobasal reflection of sperm duct |
|--------------------------------------|------------------------------------------------------|--------------|-------------------------------------------------------|---------------------------------------|
| Buthidae                             | Horizontal compression and two internal processes    | Folded       | Both prolateral and retrolateral                      | Absent                                |
| Pseudochactidae                      | No horizontal compression and two internal processes | Simple       | Both prolateral and retrolateral                      | Absent                                |
| Chaeriliidae                         | Minor compression and two internal processes         | Folded       | Both prolateral and retrolateral                      | Absent                                |
| Iuridae                              | Posterior depression and single internal process     | Folded       | Both prolateral and retrolateral                      | Absent                                |
| Bothriuridae                         | Posterior depression and single internal process     | Folded       | Single prolateral or both prolateral and retrolateral | Present                               |
| Superstitioniidae                    | Posterior depression and single internal process     | Folded       | Both prolateral and retrolateral                      | Absent                                |
| Vaejovidae (Smeringurinae)           | Posterior depression and single internal process     | Folded       | Both prolateral and retrolateral                      | Absent                                |
| Chactidae ( <i>Anuroctonus</i> )     | Posterior depression and single internal process     | Folded       | Both prolateral and retrolateral                      | Absent                                |
| Chactidae ( <i>Brotheini</i> )       | Posterior depression and single internal process     | Folded       | Both prolateral and retrolateral                      | Absent                                |
| Euscorpiidae                         | Posterior depression and single internal process     | Folded       | Both prolateral and retrolateral                      | Absent                                |
| Scorpiopidae                         | Posterior depression and single internal process     | Folded       | Both prolateral and retrolateral                      | Absent                                |
| Troglotayosicidae                    | Posterior depression and single internal process     | Folded       | Both prolateral and retrolateral                      | Absent                                |
| Caraboctonidae                       | Posterior depression and single internal process     | Folded       | Both prolateral and retrolateral                      | Absent                                |
| Vaejovidae (Syntropinae)             | Posterior depression and single internal process     | Folded       | Both prolateral and retrolateral                      | Absent                                |
| Urodacidae                           | Posterior depression and single internal process     | Folded       | Single prolateral pedal spur                          | Present                               |
| Hormuridae ( <i>Liocheles</i> )      | Posterior depression and single internal process     | Simple       | Single prolateral pedal spur                          | Present                               |
| Diplocentridae                       | Posterior depression and single internal process     | Folded       | Single prolateral pedal spur                          | Present                               |
| Hormuridae ( <i>Opisthacanthus</i> ) | Posterior depression and single internal process     | Simple       | Single prolateral pedal spur                          | Present                               |
| Hormuridae ( <i>Hadogenes</i> )      | Posterior depression and single internal process     | Simple       | Single prolateral pedal spur                          | Present                               |
| Scorpionidae                         | Posterior depression and single internal process     | Folded       | Single prolateral pedal spur                          | Present                               |

| Taxon                                | Lateral eyes             | Posterior edges of spiracles                             | Distal edges of book lung lamellae | Development  |
|--------------------------------------|--------------------------|----------------------------------------------------------|------------------------------------|--------------|
| Buthidae                             | Five pairs               | flattened subconical structures or subconical structures | smooth or wrinkled                 | Apoikogenic  |
| Pseudochactidae                      | One pair                 | flattened subconical structures                          | spiniform                          | Apoikogenic  |
| Chaeriliidae                         | Two pairs                | subconical structures                                    | pillow-like pads                   | Apoikogenic  |
| Iuridae                              | Two pairs or three pairs | chisel-like structures                                   | meandering bulges                  | Apoikogenic  |
| Bothriuridae                         | Three pairs              | subconical structures                                    | spiniform                          | Apoikogenic  |
| Superstitioniidae                    | Two pairs                | hillock-like structures                                  | arcuate structures                 | Apoikogenic  |
| Vaejovidae (Smeringurinae)           | Three pairs              | flattened lobe-like structures                           | spiniform                          | Apoikogenic  |
| Chactidae ( <i>Anuroctonus</i> )     | Two pairs                | hillock-like structures                                  | bristles                           | Apoikogenic  |
| Chactidae ( <i>Brotheini</i> )       | Two pairs                | hillock-like or subconical structures                    | bristles                           | Apoikogenic  |
| Euscorpiidae                         | Two pairs                | hillock-like structures                                  | arcuate structures                 | Apoikogenic  |
| Scorpiopidae                         | Two pairs                | hillock-like structures                                  | bristles                           | Apoikogenic  |
| Troglotayosicidae                    | Absent/vestigial         | hillock-like structures                                  | bristles                           | Apoikogenic  |
| Caraboctonidae                       | Two pairs                | subconical structures                                    | spiniform                          | Apoikogenic  |
| Vaejovidae (Syntropinae)             | Three pairs              | hillock-like structures                                  | spiniform                          | Apoikogenic  |
| Urodacidae                           | Two pairs                | chisel-like structures                                   | bristles                           | Katoikogenic |
| Hormuridae ( <i>Liocheles</i> )      | Two pairs or three pairs | hillock-like structures                                  | arcuate structures                 | Katoikogenic |
| Diplocentridae                       | Three pairs              | hexagonal tiles                                          | arcuate structures                 | Katoikogenic |
| Hormuridae ( <i>Opisthacanthus</i> ) | Three pairs              | hexagonal tiles                                          | bristles                           | Katoikogenic |
| Hormuridae ( <i>Hadogenes</i> )      | Three pairs              | hexagonal tiles                                          | bristles                           | Katoikogenic |
| Scorpionidae                         | Three pairs              | hexagonal tiles                                          | bristles                           | Katoikogenic |

| Taxon                                | Digestive glands | Dentition of third cheliceral segment            | Book lung lamellar surfaces | Hemispermataphore lamella |
|--------------------------------------|------------------|--------------------------------------------------|-----------------------------|---------------------------|
| Buthidae                             | Compact          | Internal margin with two teeth                   | reticulate venation         | Flagelliform              |
| Pseudochactidae                      | Compact          | Internal margin with row of serrations/denticles | simple, conical trabeculae  | Flagelliform              |
| Chaeriliidae                         | Compact          | Internal margin with row of serrations/denticles | reticulate venation         | Lamelliform               |
| Iuridae                              | Compact          | Single large darkened tooth on internal margin   | simple trabeculae           | Lamelliform               |
| Bothriuridae                         | Compact          | Internal margin smooth                           | simple trabeculae           | Lamelliform               |
| Superstitioniidae                    | Compact          | Internal margin smooth                           | simple trabeculae           | Lamelliform               |
| Vaejovidae (Smeringurinae)           | Compact          | Internal margin smooth                           | simple trabeculae           | Lamelliform               |
| Chactidae ( <i>Anuroctonus</i> )     | Compact          | Internal margin smooth                           | simple trabeculae           | Lamelliform               |
| Chactidae ( <i>Brotheini</i> )       | Compact          | Internal margin smooth                           | simple trabeculae           | Lamelliform               |
| Euscorpiidae                         | Compact          | Internal margin smooth                           | simple trabeculae           | Lamelliform               |
| Scorpiopidae                         | Compact          | Internal margin smooth                           | simple trabeculae           | Lamelliform               |
| Troglotayosicidae                    | Compact          | Internal margin smooth                           | bristle like trabeculae     | Lamelliform               |
| Caraboctonidae                       | Compact          | Single large darkened tooth on internal margin   | simple trabeculae           | Lamelliform               |
| Vaejovidae (Syntropinae)             | Compact          | Internal margin smooth                           | simple trabeculae           | Lamelliform               |
| Urodacidae                           | Digitiform       | Internal margin smooth                           | simple trabeculae           | Lamelliform               |
| Hormuridae ( <i>Liocheles</i> )      | Digitiform       | Internal margin smooth                           | simple trabeculae           | Lamelliform               |
| Diplocentridae                       | Digitiform       | Internal margin smooth                           | simple trabeculae           | Lamelliform               |
| Hormuridae ( <i>Opisthacanthus</i> ) | Digitiform       | Internal margin smooth                           | simple trabeculae           | Lamelliform               |
| Hormuridae ( <i>Hadogenes</i> )      | Digitiform       | Internal margin smooth                           | branched trabeculae         | Lamelliform               |
| Scorpionidae                         | Digitiform       | Internal margin smooth                           | branched trabeculae         | Lamelliform               |
